# Supplementary material for: Feasibility of achieving two-electron K–O2 batteries
Source: Royal Society of Chemistry journal article supplement (doi:10.1039/d3fd00085k), 2023-07-11
Supplement: d3fd00085k1.pdf [file d3fd00085k1.pdf]

## Supporting materials

### Feasibility of Achieving Two-Electron K-O<sub>2</sub> Batteries

Lei Qin,<sup>a</sup> Huiling Ao<sup>b</sup> and Yiyang Wu<sup>\*b</sup>

---

- [a] Prof. L. Qin  
Institute for Advanced Study (IAS)  
Shenzhen University  
Shenzhen 518060, (P. R. China)
- [b] H. Ao, Prof. Y. Wu  
Department of Chemistry and Biochemistry  
The Ohio State University  
100 West 18th Avenue, Columbus, OH 43210 (USA)  
E-mail: wu@chemistry.ohio-state.edu

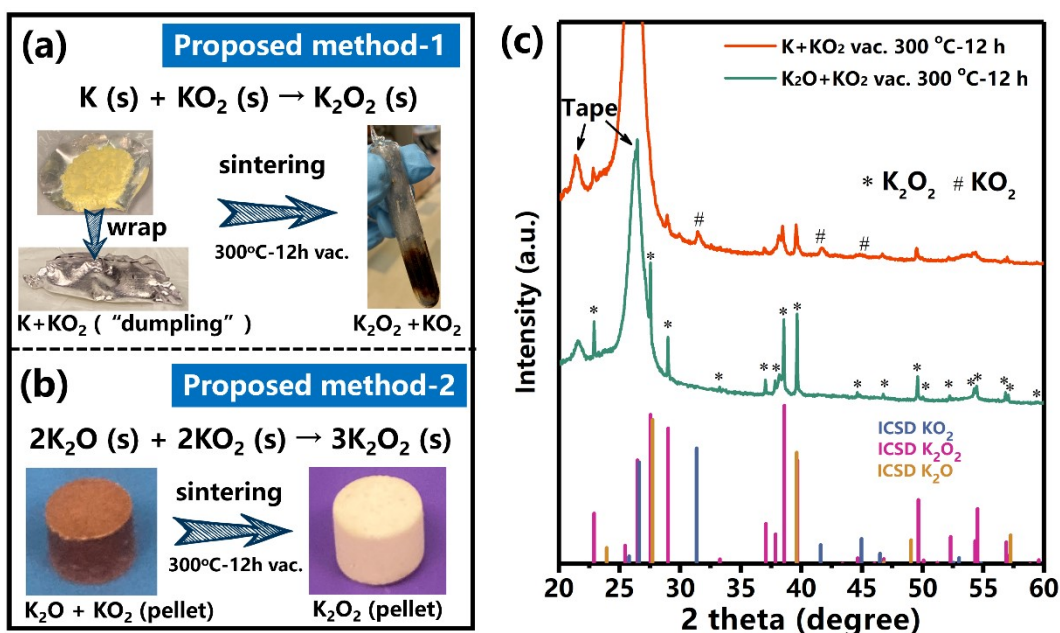

**Figure S1. Proposed two methods to synthesize  $K_2O_2$ .** (a) Rolling the K chunks with the pasta machine and wrapping the commercial  $KO_2$  powder with the obtained K foil, followed by heating treatment at 300 °C for 12 hours under vacuum. (b) Cold-pressing the  $KO_2$  and  $K_2O$  powder mixture into a cylindrical pellet, followed by sintering at 300 °C for 12 hours under vacuum. (c) XRD patterns of the as-synthesized products via two proposed methods. Details can be found in the **Experimental Section**.

For the  $K_2O_2$  synthesis route 1, it is proposed that the K solid would first melt at the evaluated temperature (above 64 °C) and become a liquid with high surface tension, which may result in poor contact between the liquified K and  $KO_2$  solid. In addition, the K may also evaporate during heating under vacuum, further leading to K loss for reaction.

In comparison, the solid-solid reaction in the synthesis route 2 could ensure tight contact between the reactants, which is proposed to circumvent the issue associated with the usage of metallic K.

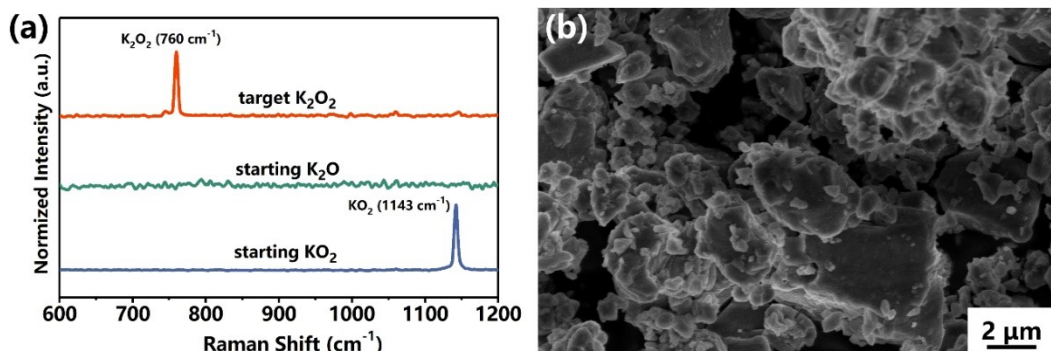

**Figure S2. Characterization on the as-synthesized  $K_2O_2$ .** (a) Raman spectra of the  $K_2O_2$  and the corresponding starting materials of  $K_2O$  and  $KO_2$ . (b) Typical SEM image of the as-obtained  $K_2O_2$ .
